# Supplementary material for: Structure of the Wilson disease copper transporter ATP7B
Source: PubMed Central journal article supplement — Sci Adv. 2022 Mar 4;8(9):eabl5508. doi: 10.1126/sciadv.abl5508 (PMC8896786; doi:10.1126/sciadv.abl5508), 2022-03-04
Supplement: sciadv.abl5508_sm.pdf [file sciadv.abl5508_sm.pdf]

Supplementary Materials for  
**Structure of the Wilson disease copper transporter ATP7B**

Ryan M. Bitter, SeCheol Oh, Zengqin Deng, Suhaila Rahman, Richard K. Hite\*, Peng Yuan\*

\*Corresponding author. Email: hiter@mskcc.org (R.K.H.); yuanp@wustl.edu (P.Y.)

Published 4 March 2022, *Sci. Adv.* **8**, eabl5508 (2022)  
DOI: 10.1126/sciadv.abl5508

**This PDF file includes:**

Figs. S1 to S5  
Table S1

|        |     |                                                                   |
|--------|-----|-------------------------------------------------------------------|
| xATP7B | 1   | -----MFPKRILDEEEGVQLLSTENEKCS TKRRSSPQFCVN---NTFSDSPVSVWKEAK      |
| hATP7B | 1   | -----MPEQERQITAREGASRKILS---KLS--LPTRAWEPAM                       |
| xATP7A | 1   | METDSRAFLAFIPVEGMTCNCSVQTIEQKIGSINGVHSIKVSLEGKNAIIYDAKLQTPK       |
| hATP7A | 1   | MDPSMGVNSVTISVEGMTCNCSVWTIEQQIGKVGNVHHIKVSLEEKNAIIYDPKLQTPK       |
| LpCopA |     | -----                                                             |
|        |     |                                                                   |
| xATP7B | 52  | KPSCAFDNRGYEGSPDDLCSLPDDVGSVVVAIQGMTQCQSCVQSI EGRISKVSGVVGINVC    |
| hATP7B | 34  | KKSFAFDNVGYEGGLDGLG-PSSQVATSTVRILGMTQCQSCVKSIEDRISNLKGIISMKVS     |
| xATP7A | 61  | ALQEAVEDMGFESTLSYANPQPVPMDSTFLRLS-AEQSA--EQIRSGLSQFKGVLDVKTS      |
| hATP7A | 61  | TLQEAIIDDMGFDAVIHNPDLPLVLTDTLFLTVT-ASLTLPWDHIQSTLLKTKGVTDIKIY     |
| LpCopA |     | -----                                                             |
|        |     |                                                                   |
| xATP7B | 112 | LEQNNAIVNYLQTEITPHKICEEIEDMGFDASLSEQS-GMPSSVKSSYYGDNVIKIRVEG      |
| hATP7B | 93  | LEQGSATVKYVPSVVCLQQVCHQIGDMGFEASIAEGK-AASWPSRSLPAQEAVVKLRVEG      |
| xATP7A | 118 | LEGKVACVTFIPSVVNPGLLIQKIPGLSLDSMASKKTTSGSVESRSSVASDVLVKMKIEG      |
| hATP7A | 120 | PQKRTVAVTIIPSI VNNANQIKELVPELSLDTGTLEKKSGACEDHSMQAAGEVVLKMKVEG    |
| LpCopA |     | -----                                                             |
|        |     |                                                                   |
| xATP7B | 171 | MTCQSCVNTIEGKIGKIQGVQKIKVSLTGQEA VITYQSHIIQAEDLRKYIEDMGFEASIK     |
| hATP7B | 152 | MTCQSCVSSIEGKVRKLGVRVVKVLSLNQEA VITYQPYLIQPEDLRDHVNDMGFEAAIK      |
| xATP7A | 178 | MTCHSCTSTIEGKVGKLGVRQRIKVS LDSQEAQILYQPHLIKPEDIRTQIEEAGFIAQIK     |
| hATP7A | 180 | MTCHSCTSTIEGKIGKLGQVQRIKVS LDNQEATIVYQPHLISVEEMKKQIEAMGFPAFVK     |
| LpCopA |     | -----                                                             |
|        |     |                                                                   |
| xATP7B | 231 | NKPDPTKLG TIDIERLQN-----SIAENHS-----GHTNSNTVTLG--IDGMHCKSC        |
| hATP7B | 212 | SKVAPLSLGPIDIERLQSTNPKRPLSSANQNFNNSETLGHQGSHVVTLQLRIDGMHCKSC      |
| xATP7A | 238 | SKP-PQKLG AIDIERLTN-----TQTNSNGDLPQKIPKHQNDLIRAI FQIEGMHCKSC      |
| hATP7A | 240 | KQPKYLKLG AIDVERLKN-----TPVKSSEGSQQRSPSYTNDST-ATFIIDGMHCKSC       |
| LpCopA |     | -----                                                             |
|        |     |                                                                   |
| xATP7B | 276 | VHNIIEGYVSLGAGIQSIRVSLKNKNAV VCLSQGSTSLLSLKESIENLPPGKFKVTL PVGV   |
| hATP7B | 272 | VLNIEENIGQLLG VQSIQVSL ENKTAQVKYDPSCTSPVALQRAIEALPPGNFKVSLPDGA    |
| xATP7A | 290 | VVNIESNIGSQHGVS SIEVSL ENKLAVIH FYSNITTS DALIQAIEALS PGTFKVSLCNHP |
| hATP7A | 292 | VSNIESTLSALQYVSSIVVSL ENRS AIVKYNASSVTPESLRKAIEAVSPGLYRV SIT---   |
| LpCopA |     | -----                                                             |
|        |     |                                                                   |
| xATP7B | 336 | EKG---QSLARNSTHSSHRDQSMG-----GNIAIISIGGMTQCQSCVSS IENMISQRKGV     |
| hATP7B | 332 | EGSGTDHRSSSSHS PGSPPRNQVQGT----CSTTLIAIAGMTCASCVHSIEGMI SQLEGV    |
| xATP7A | 350 | ELAETFMSQKNSEASC AKEIFSSPSNQDFCSKVTVINIEGMTCMSCVQSIEGLISKKPGV     |
| hATP7A | 349 | --SEVESTSNSPSSSSLQKIP LNVVSQPLT-QETVINIDGMTCNCSVQSI EGVISKKPGV    |
| LpCopA |     | -----                                                             |
|        |     |                                                                   |
| xATP7B | 387 | LHILVSLDEGN GNI FYNPCETNAEELRAAIEDMGFHSTLVSDNSPSISCS EYNSKEEENK   |
| hATP7B | 388 | QQISVSLAEGTATVLYNPSVISPEELRAAIEDMGFEASV VSESCSTNPLGNHSAGNSMVQ     |
| xATP7A | 410 | KSIQVSLVNNNGTVQYDPAVTS PEDIRAAIEDMGFDASLLANTGQADAF TSEAS-----     |
| hATP7A | 406 | KSIRVSLANSNGTVEYDPLLTSPETLRGAIEDMGFDATLSDTNEPLV VVIAQPSS-----     |
| LpCopA |     | -----                                                             |

|        |     |                                                                      |
|--------|-----|----------------------------------------------------------------------|
| xATP7B | 447 | QTP--PKATRQISGSRDYILDVLPKKSHPDFANEKYDTAPEKCFLOITG <b>MTCISC</b> VSNI |
| hATP7B | 448 | TTDGTPTSVQEVAPHTGRLPANHAPDILAKSPQSTRAVAPQKCFLOIKG <b>MTCASC</b> VSNI |
| xATP7A | 464 | -----QKPFLLNSLLPKERTNKETPVHSHKPEKRTV-NKCFIQITG <b>MTCASC</b> VANIE   |
| hATP7A | 460 | -----EMPLLTSTN-EFYTKGMPVQDKKEEGKNS-SKCYIQVTG <b>MTCASC</b> VANIE     |
| LpCopA | 1   | -----MK                                                              |

**MBD5**

|        |     |                                                              |
|--------|-----|--------------------------------------------------------------|
| xATP7B | 505 | RNLKKKDGIVSVLVALMSGKAEVKFYDPRIEPLIEIAQLVEDLGFASVMEDYTASDGNVE |
| hATP7B | 508 | RNLQKEAGVLSVLVALMAGKAEIKYDPEVIQPLEIAQFIQDLGFEEAVMEDYAGSDGNIE |
| xATP7A | 513 | RNLRREEGIYSVLVALMAGKAEVRYNPEVLQPSGIAELIQELGFEEAVLENYDDGTGILE |
| hATP7A | 508 | RNLRREEGIYSILVALMAGKAEVRYNPAVIQPPMIAEFIRELGFATVIENADEGDGVLE  |
| LpCopA | 3   | HDHHQG-----HTHSGKGHACHH-----EHNSPKTQQAS                      |

**MBD6**

|        |     |                                                                       |
|--------|-----|-----------------------------------------------------------------------|
| xATP7B | 565 | LIITG <b>MTCASC</b> VHNIESRLMRTPGILQASVALATCKAQVKFDPEIVGPRDIRIEGIGF   |
| hATP7B | 568 | LTITG <b>MTCASC</b> VHNIESKLTRTNGITYASVALATSKALVKFDPEIIGPRDIKIIIEEIGF |
| xATP7A | 573 | LLVRG <b>MTCASC</b> VHKIESRLMKTGVLYSVALATNKAHIKFDPEIVGPRDIMKIINDLGF   |
| hATP7A | 568 | LVVVG <b>MTCASC</b> VHKIESLTKHRGILYCSVALATNKAHIKYDPEIIGPRDIHTIESLGF   |
| LpCopA | 32  | SKMEGPVIVYTCPMHPEIRQSAPGHCPLCGMALEPETVTVS---EVSF-----                 |

|        |     |                                                                                         |
|--------|-----|-----------------------------------------------------------------------------------------|
| xATP7B | 625 | QASLAKRDPTAHKLDHKE <b>E</b> IKQWRNSFLFSLFSGIPVII <b>LM</b> IY <b>ML</b> AANK-----       |
| hATP7B | 628 | HASLAQRNPNAHHLDHK <b>E</b> IKQWKKSFLCSLVFGIPVMAL <b>MI</b> Y <b>ML</b> IPSN-----        |
| xATP7A | 633 | STSLVKKDRSASHLDHR <b>V</b> EIQRWKRSFLISLIFCIPVMGL <b>MV</b> H <b>MM</b> FMENHYLMPHH-HNM |
| hATP7A | 628 | EASLVKKDRSASHLDH <b>K</b> REIRQWRRSFLVSLFFCIPVMGL <b>MI</b> Y <b>MM</b> VMDHFFATLHHNQNM |
| LpCopA | 77  | ----- <b>E</b> YLDMRRRFWIALMLTIPVVILE <b>MG</b> GHGLKH-----                             |

|        |     |                                                                                        |
|--------|-----|----------------------------------------------------------------------------------------|
| xATP7B | 674 | -----DHHNTMVLDRNIVPGLSIIINLVFFILCTFVQTL <b>GG</b> RYFYVQAY <b>K</b> SLKHKATN <b>MD</b> |
| hATP7B | 677 | -----EPHQSMVLDHNIIPGLSILNLIFFILCTFVQL <b>GG</b> WYFYVQAY <b>K</b> SLRHRSAN <b>MD</b>   |
| xATP7A | 692 | TMEDIASYHPTMVLEYQIIPGLSIMNLVSLLLCIPVQFL <b>GG</b> WYFYIQAY <b>K</b> ALKHRTAN <b>MD</b> |
| hATP7A | 688 | SKEEMINLHSSMFLERQILPGLSVMNLLSFLLCVPVQFF <b>GG</b> WYFYIQAY <b>K</b> ALKHRTAN <b>MD</b> |
| LpCopA | 108 | -----FISNGSS-WIQLLLATPVVLW <b>GG</b> WPFKRGWQSLKTGQLN <b>MF</b>                        |

|        |     |                                                                                                                 |
|--------|-----|-----------------------------------------------------------------------------------------------------------------|
| xATP7B | 728 | VLIVLATTIAYIYSVVILTVA-MVEKADKSP---ETFFD <b>TP</b> P <b>ML</b> FMFIAL <b>GR</b> W <b>LE</b> H <b>IA</b> <b>K</b> |
| hATP7B | 731 | VLIVLATSIAVYVSLVILVVA-VAEKAERSP---VTFFD <b>TP</b> P <b>ML</b> FVFIAL <b>GR</b> W <b>LE</b> H <b>LA</b> <b>K</b> |
| xATP7A | 752 | VLIVLATSVAFIYSLIVLIVA-IFEKSKVNP---ITFFD <b>TP</b> P <b>ML</b> FVFIAL <b>GR</b> W <b>LE</b> H <b>IA</b> <b>K</b> |
| hATP7A | 748 | VLIVLATTIAFAYSLIILLVA-MYERAKVNP---ITFFD <b>TP</b> P <b>ML</b> FVFIAL <b>GR</b> W <b>LE</b> H <b>IA</b> <b>K</b> |
| LpCopA | 150 | TLIAMGIGVAWIYSMAVAVLWPGVFPFAFRSQEGVVAVY <b>F</b> EAAAVITTLVLLGQVLE <b>EL</b> K <b>AR</b>                        |

**A domain**

|        |     |                                                              |
|--------|-----|--------------------------------------------------------------|
| xATP7B | 783 | SKTSEALAKLISLQATEAAVVTFGANQIILREEQVAVELVQRGDIVKVVPGGKFPVDGKV |
| hATP7B | 786 | SKTSEALAKLSLQATEATVVTLGEDNLIIREEQVPMELVQRGDIVKVVPGGKFPVDGKV  |
| xATP7A | 807 | SKTSEALSRLISLQATEATVILDPDNTVKSEEQVDVELVQRGDIVRVTGGKFPVDGRV   |
| hATP7A | 803 | GKTSEALAKLISLQATEATIVTLSDNILLSEEQVDVELVQRGDIKVVPGGKFPVDGRV   |
| LpCopA | 210 | EQTGSAIRALLKLVPESAHRIKEDG-----SEEEVSLDNVAVGDLRLVRPGEKIPVDGEV |

**A domain**

|        |     |                                                                        |
|--------|-----|------------------------------------------------------------------------|
| xATP7B | 843 | IEGTSMADES <b>LITGE</b> PMPVRRKPGSMVIAGSINAHGTVLVEATHVGSSETTLAQIVKLVEE |
| hATP7B | 846 | LEGNTMADES <b>LITGE</b> AMPVTKKPGSTVIAGSINAHGSVLIKATHVGNDDTLAQIVKLVEE  |
| xATP7A | 867 | IEGQSMVDES <b>LITGE</b> AMPVSKKPGSSVIAGSINQNGSLLIAATHVGSDDTLAQIVKLVED  |
| hATP7A | 863 | IEGHSMVDES <b>LITGE</b> AMPVAKKPGSTVIAGSINQNGSLLICATHVGADTTLSQIVKLVEE  |
| LpCopA | 265 | QEGRSFVDESMV <b>TGE</b> PIPVAKEASAKVIGATINQTSFVMKALHVGSDTMLARIVQMVS    |

|        |      |                                                                        |                                                           |                    |                 |
|--------|------|------------------------------------------------------------------------|-----------------------------------------------------------|--------------------|-----------------|
|        |      |                                                                        | <b>A domain</b>                                           | M3                 |                 |
| xATP7B | 903  | AQMSKAPIQQLA                                                           | <b>DK</b> ISGYFVPFIIISVVTLVTWIIIGFVNF                     | DI IKYFPSYSKNISKTE |                 |
| hATP7B | 906  | AQMSKAPIQQLA                                                           | <b>DR</b> FSGYFVPFIIIMSTLTLVWVIVIGFIDFGVVQRYFPNPNKHISQTE  |                    |                 |
| xATP7A | 927  | AQTSKAPIQQFA                                                           | <b>DK</b> LSGYFVPFIVAVSVLTLFVWIIIGYHNFEIVEKYFPGYNKSISKGE  |                    |                 |
| hATP7A | 923  | AQTSKAPIQQFA                                                           | <b>DK</b> LSGYFVPFIVFVSIATLLVWVIVIGFLNFEIVETYFPGYNRSISRTE |                    |                 |
| LpCopA | 325  | AQRSRAPIQRLA                                                           | <b>D</b> TVSGWFPVAVILVAVLSFIVWALLG-----                   | PQ                 |                 |
|        |      |                                                                        | M4A                                                       | M4B                | <b>P domain</b> |
| xATP7B | 963  | VIIRVAFQTSITVLSIA                                                      | <b>CPC</b> ALGLATPTAVMVGTVGAAQNGILIKGGPELEMAHKIKAVM       |                    |                 |
| hATP7B | 966  | VIIRFAFQTSITVLCIA                                                      | <b>CPC</b> SLGLATPTAVMVGTVGAAQNGILIKGGKPLEMAHKIKTVM       |                    |                 |
| xATP7A | 987  | VIVRFAFQAAITVLCIA                                                      | <b>CPC</b> SLGLATPTAVMVGTVGVAQNGILIKGGPELEMAHKVKTVV       |                    |                 |
| hATP7A | 983  | TIIRFAFQASITVLCIA                                                      | <b>CPC</b> SLGLATPTAVMVGTVGVAQNGILIKGGPELEMAHKVQVVV       |                    |                 |
| LpCopA | 365  | PALSYGLIAAVSVLI                                                        | <b>IACPC</b> ALGLATPMSIMVGVGKGAQSGVLIKNAEALERMEKVNTLV     |                    |                 |
|        |      |                                                                        | <b>N domain</b>                                           |                    |                 |
| xATP7B | 1023 | <b>FDKTGT</b> IITHGVPKVMRVLLLGDVVKMPLKRMLAVVGTAEASSEHPLGMAVTKYCKEELGT  |                                                           |                    |                 |
| hATP7B | 1026 | <b>FDKTGT</b> IITHGVPRVMRVLLLGDVATLPLRKLAVVGTAEASSEHPLGVAVTKYCKEELGT   |                                                           |                    |                 |
| xATP7A | 1047 | <b>FDKTGT</b> ITKGTTPVVMQVKVLVESNRMPSNKL LAIVGTAESNSEHPLGSAVIKYCKEVLNA |                                                           |                    |                 |
| hATP7A | 1043 | <b>FDKTGT</b> IITHGTPVNVQVKVLTESNRISHHKILAIIVGTAESNSEHPLGTAITKYCKQELDT |                                                           |                    |                 |
| LpCopA | 425  | <b>VDKTG</b> TLTEGHPKLTRIVT----DDFVEDNALALAAALEHQSEHPLANAIVHAAKEKG--   |                                                           |                    |                 |
|        |      |                                                                        | <b>N domain</b>                                           |                    |                 |
| xATP7B | 1083 | ELLYCYTDFQAVPGCGISCKVNNIESVLVQNEE---GLNEQNSYRNSLIGT-----TDSS           |                                                           |                    |                 |
| hATP7B | 1086 | ETLGYCYTDFQAVPGCGIGCKVSNVEGILAHSER---PLSAPASHLN-----EAGS               |                                                           |                    |                 |
| xATP7A | 1107 | ETLGTCTDFQAVPGCGISCKVNNIEPLLHAANG---PDNKRNAVVLVQIDGQHEDSILPSI          |                                                           |                    |                 |
| hATP7A | 1103 | ETLGTCTDFQVVPGCGISCKVTNIEGLLHKNNWNIEDNNIKNASLVQIDASNEQSSTSSS           |                                                           |                    |                 |
| LpCopA | 479  | LSLGSVEAFEAPTGKGVVQVD-----                                             |                                                           |                    |                 |
|        |      |                                                                        | <b>N domain</b>                                           |                    |                 |
| xATP7B | 1135 | LIITPELLGAQAPLAHTVLIGNREWMRRNGLHISTDVDEAMSSHEMKGQTAVLVAIDGEL           |                                                           |                    |                 |
| hATP7B | 1133 | LPAEKDAV----PQTFSVLIGNREWLRRNGLTISSDVSDAMTDHEMKGQTAILVAIDGVL           |                                                           |                    |                 |
| xATP7A | 1164 | TVSQNPSNGSSPQTYSVLIGNREWMNRNFLTTLTAETDSLMTHEHEKGRTAVLVAVDGVV           |                                                           |                    |                 |
| hATP7A | 1163 | MIIDAQISNALNAQQYKVLIGNREWMIRNGLVINNDVNDFMTEHERKGRTAVLVAVDDEL           |                                                           |                    |                 |
| LpCopA | 501  | -----GHHVAIGNARLMQEHGGDN-APLFEKADELGRGKASVMFMAVDGKT                    |                                                           |                    |                 |
|        |      |                                                                        | <b>P domain</b>                                           |                    |                 |
| xATP7B | 1195 | CGMIAIADTVKQEAAALAVHTLKSMDIVVLTIGDNRKTAKAIATQVGIKKVF AEVLP SHK         |                                                           |                    |                 |
| hATP7B | 1189 | CGMIAIADAVKQEAAALAVHTLQSMGVDVVLITIGDNRKTARAIATQVGINKVF AEVLP SHK       |                                                           |                    |                 |
| xATP7A | 1224 | CGLIAIADTVKPEAALAIHSLRSMGLDIVLMTGDNSKTAKTIAAQVGITKVF AEVLP SHK         |                                                           |                    |                 |
| hATP7A | 1223 | CGLIAIADTVKPEAELAIHILKSMGLEVLMTGDNSKTARSIASQVGITKVF AEVLP SHK          |                                                           |                    |                 |
| LpCopA | 546  | VALLVVEDPIKSSTPETILELQQSGIEIVMLTGDSKRTAEAVAGTLGIKKVV AEIMPEDK          |                                                           |                    |                 |
|        |      |                                                                        | <b>P domain</b>                                           |                    |                 |
| xATP7B | 1255 | VAKVQALQSDNKRVMVGDGVNDSPALARADVGIAIGTGTDVAIEAADIVLIRNDLLDVV            |                                                           |                    |                 |
| hATP7B | 1249 | VAKVQELQNKGGKVMVGDGVNDSPALAQADMGVVIAIGTGTDVAIEAADVVLIRNDLLDVV          |                                                           |                    |                 |
| xATP7A | 1284 | VAKVKQLQEQGTRVAMVGDGINDSPALAMADVGITIGSGTDVAIEAADVVLIRNDLLDVV           |                                                           |                    |                 |
| hATP7A | 1283 | VAKVKQLQEEGKRVAMVGDGINDSPALAMANVGIAIGTGTDVAIEAADVVLIRNDLLDVV           |                                                           |                    |                 |
| LpCopA | 606  | SRIVSELKDKGLIVAMAGDGVNDAPALAKADIGIAMGTGTDVAIESAGVTL LHGDLRGIA          |                                                           |                    |                 |
|        |      |                                                                        | M5                                                        | M6                 |                 |
| xATP7B | 1315 | ASIHLSKRTVRRIRLNLFV FAL IYNLLG IPIAAGVFMPAG-LVLQPW                     | <b>MGSAA</b>                                              | <b>MAAS</b>        | <b>SVSVV</b>    |
| hATP7B | 1309 | ASIHLSKRTVRRIRINLV LAL IYNLVG IPIAAGVFMPIG-IVLQPW                      | <b>MGSAA</b>                                              | <b>MAAS</b>        | <b>SVSVV</b>    |
| xATP7A | 1344 | ASIDLSRKTVKRIRINLFV FAL IYNLVG IPIAAGVFMPIG-LILQPW                     | <b>MGSAA</b>                                              | <b>MAAS</b>        | <b>SVSVV</b>    |
| hATP7A | 1343 | ASIDLSRKTVKRIRINLFV FAL IYNLVG IPIAAGVFMPIG-LVLQPW                     | <b>MGSAA</b>                                              | <b>MAAS</b>        | <b>SVSVV</b>    |
| LpCopA | 666  | KARRLSESTMSNIRQNLFFAFIYNVLGVPLAAGVLYPLTGLLLSP                          | <b>MAIAAA</b>                                             | <b>MA</b>          | <b>LS</b>       |

|                                      |      | M6                                                           | C-terminus |
|--------------------------------------|------|--------------------------------------------------------------|------------|
| xATP7B                               | 1374 | LSSLQLKCYRKPDSDRYEARAQGHMKPLTPSQISVHIGMDDRWRDLPKTKAWDQISYISQ |            |
| hATP7B                               | 1368 | LSSLQLKCYKKPDLERYEAQAHGHMKPLTASQVSVHIGMDDRWRDSPRATPWDQVSYVSQ |            |
| xATP7A                               | 1403 | FSSLLKLYRKPSREKLEQRVQGQMRQKSLSDISVHIGLTENRRTSTKLDLLDRIVNYSR  |            |
| hATP7A                               | 1402 | LSSLFLKLYRKPTYESYELPARSQIGQKSPSEISVHVGIDDTSRNSPKLGLLDRIVNYSR |            |
| LpCopA                               | 726  | INALRLKRVTL-----                                             |            |
| <hr style="border: 1px solid red;"/> |      |                                                              |            |
| xATP7B                               | 1434 | VSR---ASQPKRHHGSLVEQQ-DKWSLLINETHEDQMI--                     | 1467       |
| hATP7B                               | 1428 | VSLSSLTSDKPSRHSAAADDDGDKWSLLNLRDEEQYI--                      | 1465       |
| xATP7A                               | 1463 | ASLNSFLSDKHSQHSLPLSEP-DKHSLLLGLKGEEDTFL                      | 1501       |
| hATP7A                               | 1462 | ASINSLSDKRSLSNVVTSEP-DKHSLLVGDFFREDDTAL                      | 1500       |
| LpCopA                               | 736  | -----                                                        | 736        |

**Fig. S1. Sequence alignment of Cu<sup>+</sup>-ATPases.** The protein sequences of *Xenopus tropicalis* ATP7A (xATP7A, NCBI sequence: NP\_001361526.1) and ATP7B (xATP7B, NCBI sequence: XP\_002936778.2), *Homo sapiens* ATP7A (hATP7A, NCBI sequence: NP\_000043.4) and ATP7B (hATP7B, NCBI sequence: NP\_000044.2), and *Legionella pneumophila* Cu<sup>+</sup>-ATPase (LpCopA, NCBI sequence: WP\_010946759.1) are aligned. Domain boundaries and transmembrane helices are indicated for xATP7B. Conserved amino acids critical for Cu<sup>+</sup> transport are highlighted.

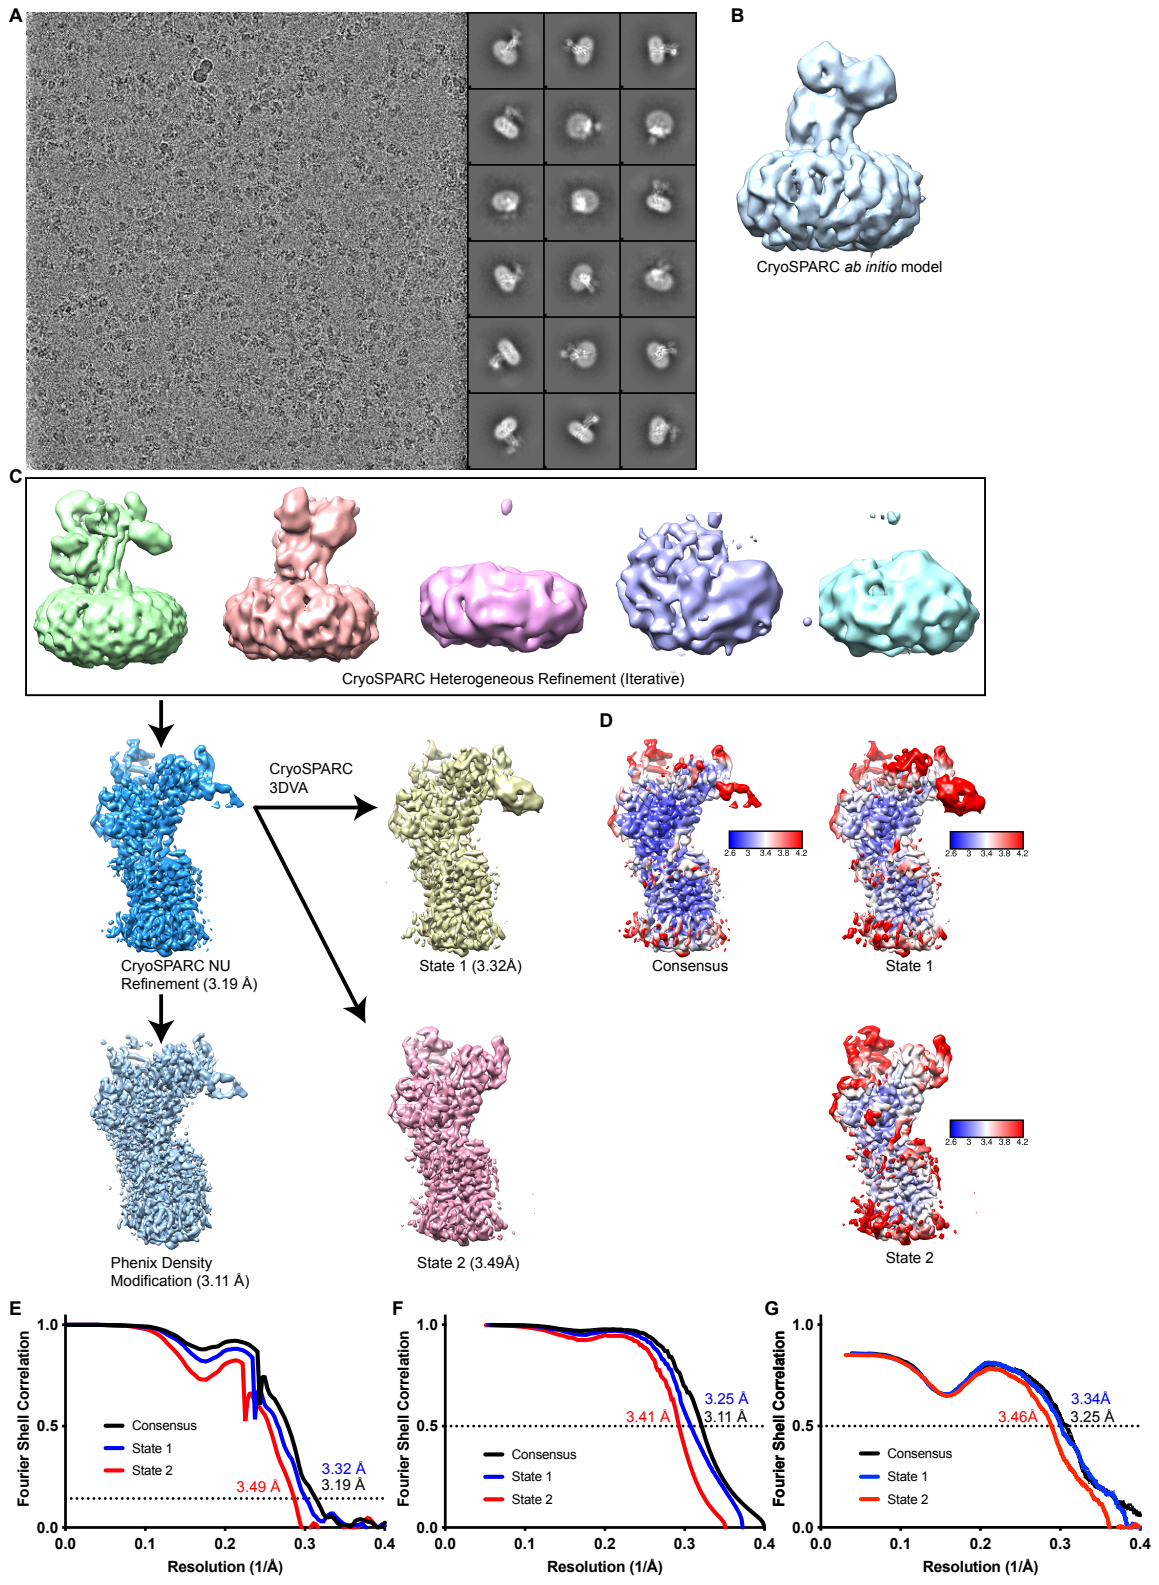

**Fig. S2. Cryo-EM processing workflow.** (A) Representative image and 2D class averages of xATP7B<sub>EM</sub>. (B) CryoSPARC *ab initio* model. (C) Simplified Cryo-EM image processing workflow for xATP7B<sub>EM</sub>. (D) Consensus, state 1 and state 2 density maps colored by local resolution using Blocres. (E-G) Fourier shell correlation (FSC) between two independent half-maps following non-uniform refinement (E), FSC between two independent half-maps following density modification (F) and FSC between density modified map and model following real space refinement (G). Black, blue and red curves correspond to consensus, state 1 and state 2 reconstructions, respectively.

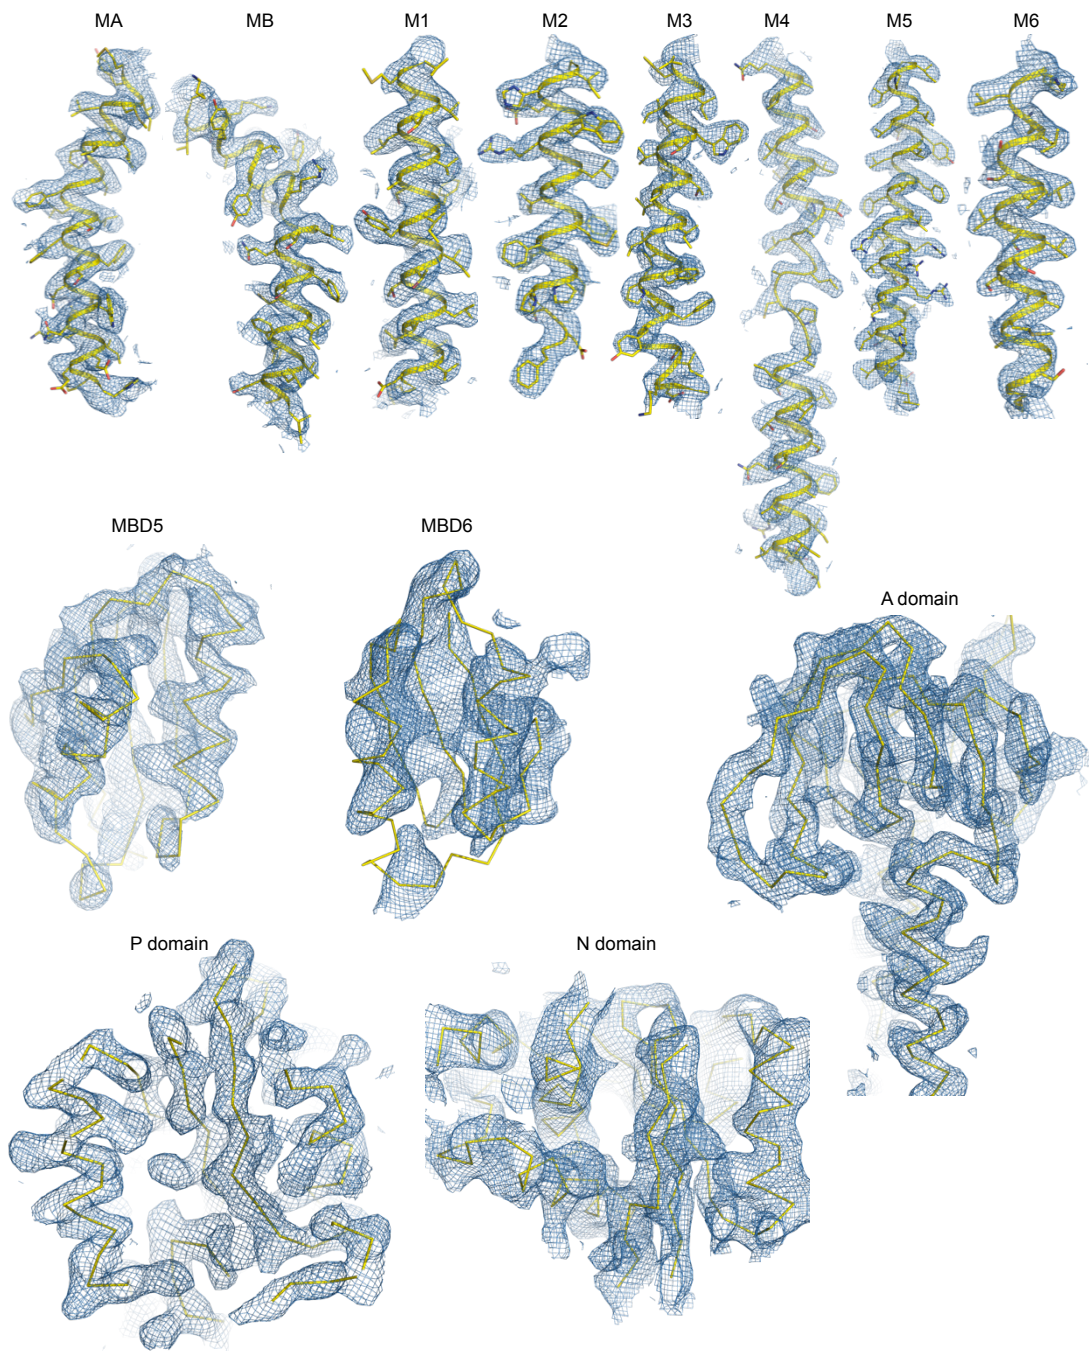

**Fig. S3. Cryo-EM density.** Representative densities of the TM helices and cytoplasmic domains for the state 1 reconstruction.



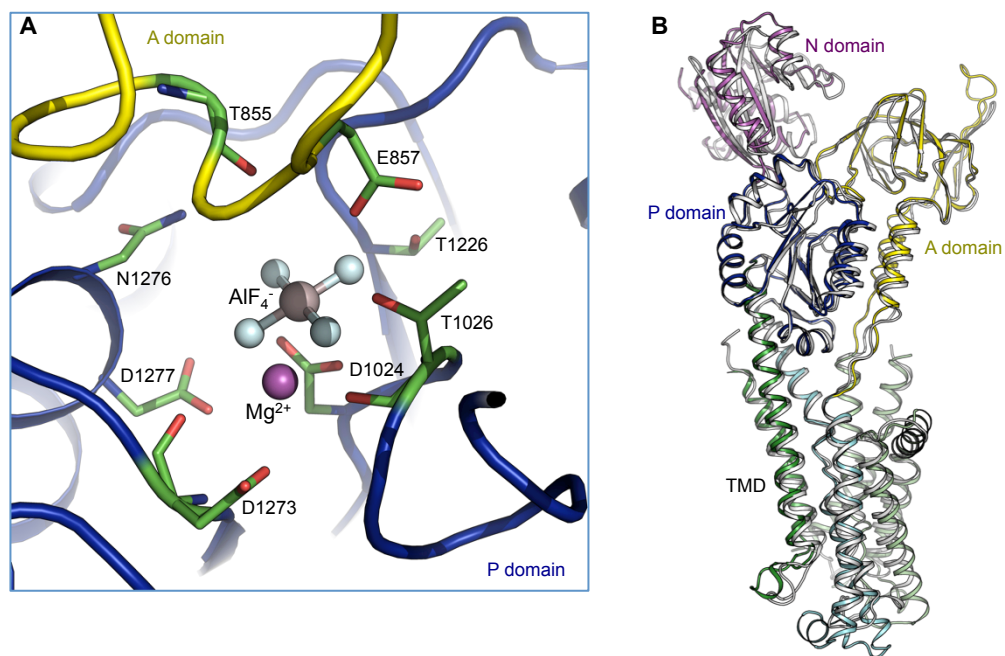

**Fig. S4. Structure of xATP7B<sub>EM</sub> in the E2-Pi state. (A)** Active site in the P domain. **(B)** Superposition of structures of LpCopA (PDB: 3RFU) and the core of xATP7B<sub>EM</sub>.

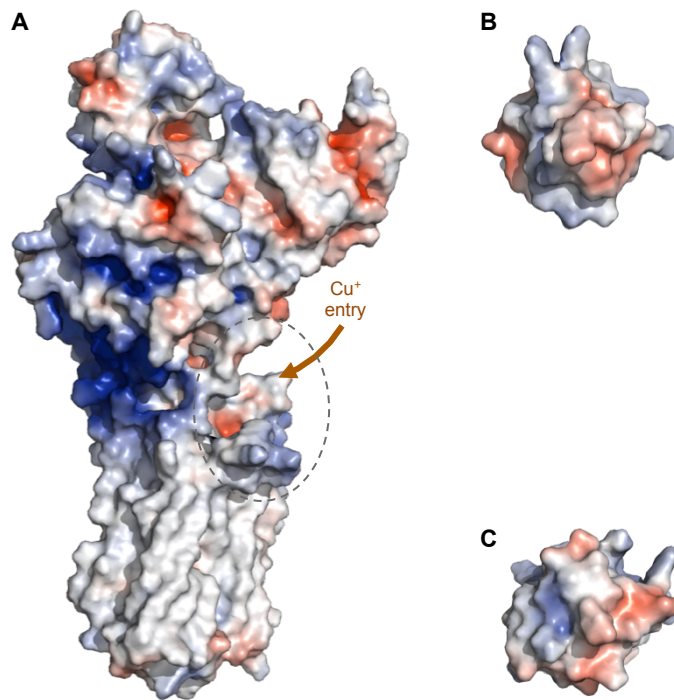

**Fig. S5. Surface electrostatic potential of the xATP7B<sub>EM</sub> core (A), MBD6 (B), and ATOX1 (C).** Surface electrostatic potential is indicated by colors (red, -5 kT/e; white, neutral; blue, +5 kT/e). The frog ATOX1 model was generated on the basis of the crystal structure of human ATOX1 (PDB code: 1FEE).

**Table S1. Cryo-EM data collection, refinement and validation statistics**

|                                                     | xATP7B <sub>EM</sub><br>Consensus<br>(EMD-25137)<br>(PDB 7S13) | xATP7B <sub>EM</sub><br>State 1<br>(EMD-25138)<br>(PDB 7S16) | xATP7B <sub>EM</sub><br>State 2<br>(EMD-25139)<br>(PDB 7S17) |
|-----------------------------------------------------|----------------------------------------------------------------|--------------------------------------------------------------|--------------------------------------------------------------|
| <b>Data collection and processing</b>               |                                                                |                                                              |                                                              |
| Magnification                                       | 22,500x                                                        | 22,500x                                                      | 22,500x                                                      |
| Voltage (kV)                                        | 300                                                            | 300                                                          | 300                                                          |
| Electron exposure (e <sup>-</sup> /Å <sup>2</sup> ) | 58.8                                                           | 58.8                                                         | 58.8                                                         |
| Defocus range (µm)                                  | -1.2 to -2.5                                                   | -1.2 to -2.5                                                 | -1.2 to -2.5                                                 |
| Pixel size (Å)                                      | 0.85                                                           | 0.85                                                         | 0.85                                                         |
| Symmetry imposed                                    | C1                                                             | C1                                                           | C1                                                           |
| Initial particle images (no.)                       | 1,889,296                                                      | 1,889,296                                                    | 1,889,296                                                    |
| Final particle images (no.)                         | 257,208                                                        | 138,790                                                      | 118,418                                                      |
| Map resolution (Å)                                  | 3.19                                                           | 3.32                                                         | 3.49                                                         |
| 0.143 FSC threshold                                 |                                                                |                                                              |                                                              |
| Density modified resolution (Å)                     | 3.11                                                           | 3.25                                                         | 3.41                                                         |
| <b>Refinement</b>                                   |                                                                |                                                              |                                                              |
| Initial model used (PDB code)                       | 3RFU                                                           | 7S13                                                         | 7S13                                                         |
| Model resolution (Å)                                | 3.25/2.71                                                      | 3.34/2.73                                                    | 3.46/2.92                                                    |
| 0.5 / 0.143 FSC threshold                           |                                                                |                                                              |                                                              |
| Model resolution range (Å)                          | 300-3.1                                                        | 300-3.2                                                      | 300-3.4                                                      |
| Model composition                                   |                                                                |                                                              |                                                              |
| Non-hydrogen atoms                                  | 6629                                                           | 6629                                                         | 5510                                                         |
| Protein residues                                    | 879                                                            | 879                                                          | 728                                                          |
| Ligands                                             | 2                                                              | 2                                                            | 2                                                            |
| <i>B</i> factors (Å <sup>2</sup> )                  |                                                                |                                                              |                                                              |
| Protein                                             | 104                                                            | 102                                                          | 71                                                           |
| Ligand                                              | 41                                                             | 51                                                           | 48                                                           |
| R.m.s. deviations                                   |                                                                |                                                              |                                                              |
| Bond lengths (Å)                                    | 0.002                                                          | 0.002                                                        | 0.002                                                        |
| Bond angles (°)                                     | 0.385                                                          | 0.460                                                        | 0.474                                                        |
| Validation                                          |                                                                |                                                              |                                                              |
| MolProbity score                                    | 0.99                                                           | 1.23                                                         | 1.40                                                         |
| Clashscore                                          | 2.14                                                           | 4.57                                                         | 5.23                                                         |
| Poor rotamers (%)                                   | 0.00                                                           | 0.00                                                         | 0.00                                                         |
| Ramachandran plot                                   |                                                                |                                                              |                                                              |
| Favored (%)                                         | 98.49                                                          | 98.61                                                        | 97.36                                                        |
| Allowed (%)                                         | 1.51                                                           | 1.39                                                         | 2.64                                                         |
| Disallowed (%)                                      | 0.00                                                           | 0.00                                                         | 0.00                                                         |
